# Supplementary material
Source: MDPI journal article supplement (https://www.mdpi.com/2073-4441/14/12/1915)
Supplement: s1 [file s1]

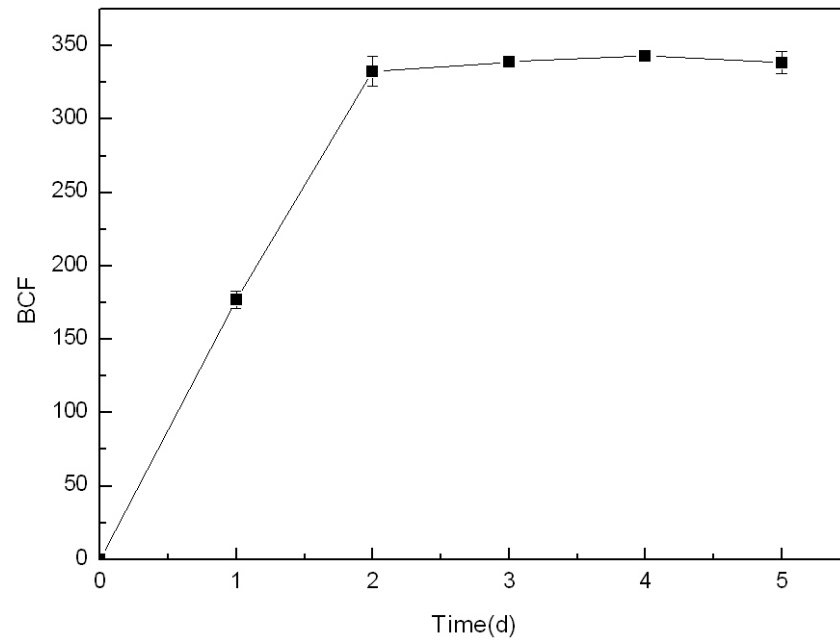

**Figure S1:** The BCF of Lindane in *M. aeruginosa* cells. Initial concentrations of Lindane and algal cells are 400 µg/L and  $2.0 \times 10^4$  cells/mL, respectively. Each value is the mean  $\pm$  S.D.

**Table S1:** The compositions of BG11 medium

|                    | Component                                            | Quality(g<br>) | Concentration<br>of stock<br>solution<br>(g/L) | Volume(ml<br>) | Concentration<br>of work<br>solution<br>(mg/L) |
|--------------------|------------------------------------------------------|----------------|------------------------------------------------|----------------|------------------------------------------------|
| stock1<br>(100ml)  | C <sub>6</sub> H <sub>8</sub> O <sub>7</sub>         | 0.6g           | 6                                              | 1              | 6                                              |
|                    | C <sub>6</sub> H <sub>10</sub> FeNO <sub>8</sub>     | 0.6g           | 6                                              | 1              | 6                                              |
|                    | EDTANa <sub>2</sub>                                  | 0.1g           | 1                                              | 1              | 1                                              |
| stock2<br>(100ml)  | K <sub>2</sub> HPO <sub>4</sub>                      | 4.0g           | 40                                             | 1              | 40                                             |
|                    | Na <sub>2</sub> CO <sub>3</sub>                      | 2.0            | 20                                             | 1              | 20                                             |
| stock3<br>(100ml)  | CaCl <sub>2</sub> ·2H <sub>2</sub> O                 | 3.58g          | 35.8                                           | 1              | 35.8                                           |
| stock4<br>(100ml)  | MgSO <sub>4</sub> ·7H <sub>2</sub> O                 | 7.0g           | 70                                             | 1              | 70                                             |
|                    | H <sub>3</sub> BO <sub>4</sub>                       | 2.86g          | 2.86                                           | 1              | 2.86                                           |
|                    | MnCl <sub>2</sub> ·4H <sub>2</sub> O                 | 1.81g          | 1.81                                           | 1              | 1.81                                           |
|                    | ZnSO <sub>4</sub> ·7H <sub>2</sub> O                 | 0.222g         | 0.222                                          | 1              | 0.222                                          |
| stock5<br>(1000ml) | Na <sub>2</sub> MO <sub>4</sub> ·2H <sub>2</sub> O   | 0.391g         | 0.391                                          | 1              | 0.391                                          |
|                    | CuSO <sub>4</sub> ·5H <sub>2</sub> O                 | 0.079g         | 0.079                                          | 1              | 0.079                                          |
|                    | Co(NO <sub>3</sub> ) <sub>2</sub> ·6H <sub>2</sub> O | 0.049g         | 0.049                                          | 1              | 0.049                                          |
| stock6             | NaNO <sub>3</sub>                                    |                |                                                |                | 1.5g/L                                         |

Adjust the pH to 7.1-7.5 by HCl and NaOH, and the medium must be autoclaved at 121°C for 30min before use.

**Table S2:** The concentrations of Lindane in algal cells of *M. aeruginosa* (96h)

| Lindane in the <i>M.aeruginosa</i><br>solution (µg/L) | Lindane in the <i>M.aeruginosa</i> cells<br>(mean ± SD, µg/L) |
|-------------------------------------------------------|---------------------------------------------------------------|
| 0                                                     | ND                                                            |
| 50                                                    | 0.767±0.063                                                   |
| 89                                                    | 1.142±0.108                                                   |
| 158                                                   | 2.437±0.156                                                   |
| 281                                                   | 3.490±0.074                                                   |
| 500                                                   | 5.353±0.428                                                   |

(ND—not detected)
